# Supplementary material for: The Association Between Urban Tree Cover and Gun Assault: A Case-Control and Case-Crossover Study
Source: Oxford University Press journal article supplement (doi:10.1093/aje/kwx096), 2017-04-05
Supplement: kwx096kondowebmaterialfinal.pdf [file kwx096kondowebmaterialfinal.pdf]

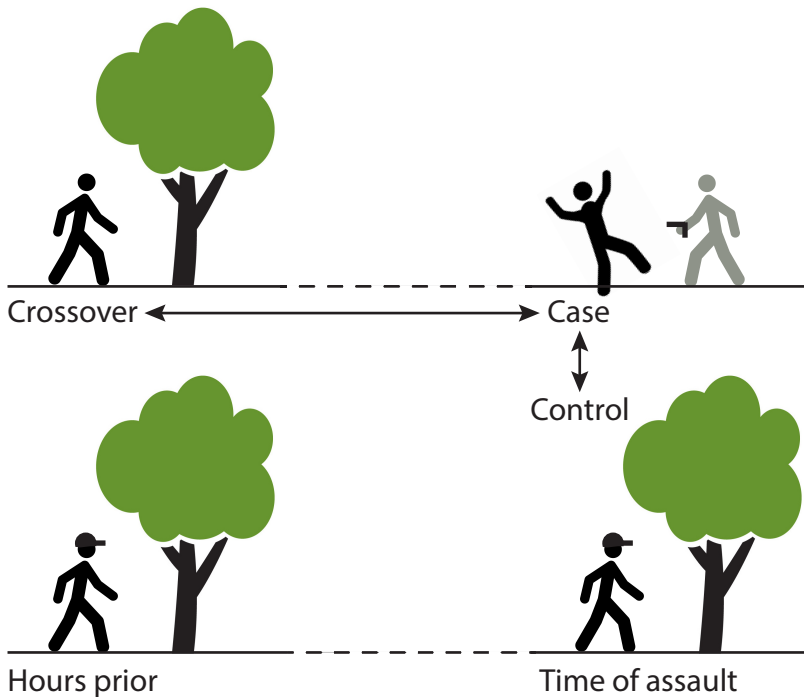

**Web Figure 1.** Illustration of the relationship between case-control and case-crossover study designs. What significance does exposure to tree cover play in the odds of interpersonal firearm violence? Using a case-control approach, a group of case participants that were assaulted (*top right*) is matched with a control group of like participants that were not assaulted (*bottom right*). Their environments at the same time of day can be compared for differences. Using a case-crossover approach, the environment of each case at the time of the assault can be compared to the environment each case experienced earlier in the day (*top left*) to rule-out the influence of factors that differ between case and control participants.
